# Supplementary material for: Socioeconomic Status as a Multidimensional Predictor of Student Achievement in 77 Societies
Source: Frontiers journal article supplement (doi:10.3389/feduc.2021.731634), 2021-11-22
Supplement: Table_1.DOCX [file Table_1.DOCX]

**Supplementary Table 1.** Countries, sample sizes, and gender composition.

| **Country** | **Sample size** | | **% boys** |
| --- | --- | --- | --- |
| Albania | 6 359 | | 50.2 |
| Argentina | 11 975 | | 48.0 |
| Australia | 14 273 | | 50.4 |
| Austria | 6 802 | | 51.2 |
| Baku (Azerbaijan) | 6 827 | | 52.2 |
| Belarus | 5 803 | | 52.2 |
| Belgium | 8 475 | | 49.6 |
| Bosnia and Herzegovina | 6 480 | | 51.4 |
| Brazil | 10 691 | | 48.8 |
| Brunei Darussalam | 6 828 | | 50.5 |
| Bulgaria | 5 294 | | 52.2 |
| Canada | 22 653 | | 50.1 |
| Chile | 7 621 | | 50.0 |
| China (Beijing-Shanghai-Jiangsu-Zhejiang) | 12 058 | | 52.1 |
| Colombia | 7 522 | | 48.7 |
| Costa Rica | 7 221 | | 49.9 |
| Croatia | 6 609 | | 49.9 |
| Czech Republic | 7 019 | | 49.9 |
| Denmark | 7 657 | | 50.2 |
| Dominican Republic | 5 674 | | 49.1 |
| Estonia | 5 316 | | 50.1 |
| Finland | 5 649 | | 50.9 |
| France | 6 308 | | 51.2 |
| Georgia | 5 572 | | 51.9 |
| Germany | 5 451 | | 53.7 |
| Greece | 6 403 | | 50.4 |
| Hong Kong | 6 037 | | 51.1 |
| Hungary | 5 132 | | 49.2 |
| Iceland | 3 296 | | 49.8 |
| Indonesia | 12 098 | | 48.4 |
| Ireland | 5 577 | | 50.2 |
| Israel | 6 623 | | 46.5 |
| Italy | 11 785 | | 51.8 |
| Japan | 6 109 | | 48.9 |
| Jordan | 8 963 | | 48.5 |
| Kazakhstan | 19 507 | | 50.9 |
| Korea | 6 650 | | 52.0 |
| Kosovo | 5 058 | | 51.4 |
| Latvia | 5 303 | | 49.4 |
| Lebanon | 5 614 | | 45.2 |
| Lithuania | 6 885 | | 51.0 |
| Luxembourg | 5 230 | | 50.4 |
| Macao | 3 775 | | 50.7 |
| Malaysia | 6 111 | | 48.8 |
| Malta | 3 363 | | 52.1 |
| Mexico | 7 299 | | 47.6 |
| Moldova | | 5 367 | 51.2 |
| Montenegro | | 6 666 | 51.4 |
| Morocco | | 6 814 | 52.1 |
| Netherlands | | 4 765 | 51.1 |
| New Zealand | | 6 173 | 48.9 |
| North Macedonia | | 5 569 | 53.4 |
| Norway | | 5 813 | 50.5 |
| Panama | | 6 270 | 49.4 |
| Peru | | 6 086 | 50.7 |
| Philippines | | 7 233 | 46.5 |
| Poland | | 5 625 | 49.2 |
| Portugal | | 5 932 | 50.4 |
| Qatar | | 13 828 | 49.7 |
| Romania | | 5 075 | 51.8 |
| Russia | | 7 608 | 49.3 |
| Saudi Arabia | | 6 136 | 51.2 |
| Serbia | | 6 609 | 50.5 |
| Singapore | | 6 676 | 50.9 |
| Slovak Republic | | 5 965 | 49.7 |
| Slovenia | | 6 401 | 53.2 |
| Spain | | 35 943 | 50.0 |
| Sweden | | 5 504 | 49.8 |
| Switzerland | | 5 822 | 52.1 |
| Taiwan | | 7 243 | 50.0 |
| Thailand | | 8 633 | 45.6 |
| Turkey | | 6 890 | 50.7 |
| Ukraine | | 5 998 | 52.4 |
| United Arab Emirates | | 19 277 | 51.3 |
| United Kingdom | | 13 818 | 49.4 |
| United States | | 4 838 | 50.9 |
| Uruguay | | 5 263 | 48.1 |
